# Supplementary material for: Accelerated screening of carbon dioxide capture by liquid sorbents
Source: Royal Society of Chemistry journal article supplement (doi:10.1039/d3dd00232b), 2024-01-01
Supplement: d3dd00232b1.pdf [file d3dd00232b1.pdf]

## Accelerated screening of carbon dioxide capture by liquid sorbents

Ryan J.R. Jones,<sup>a</sup> Yungchieh Lai,<sup>a</sup> Kevin Kan,<sup>a</sup> Dan Guevarra,<sup>a</sup> Joel A. Haber,<sup>a</sup> Natalia M. Ramirez,<sup>b</sup> Alessandra Zito,<sup>b</sup> Clarabella Li,<sup>b</sup> Jenny Y. Yang,<sup>b</sup> Aaron M. Appel,<sup>c</sup> and John M. Gregoire\*<sup>a</sup>

<sup>a</sup> Division of Engineering and Applied Science, California Institute of Technology, Pasadena, CA 91125, USA. E-mail: gregoire@caltech.edu.

<sup>b</sup> Department of Chemistry, University of California, Irvine, California 92697, USA.

<sup>c</sup> Institute for Integrated Catalysis, Pacific Northwest National Laboratory, Richland, Washington 99352, USA.

### Tetramethylammonium 2,3,4,5,6-pentafluorophenolate

The NMR and FTIR characterization are shown in Figures S1-S5. Yield: 2.259 g (97 %). <sup>1</sup>H NMR (600 MHz d-DMSO) δ 3.14 (TMA) ppm. <sup>13</sup>C{<sup>1</sup>H} NMR (151 MHz, d-DMSO) δ 147.8 (tt, *J*=14.1, 4.0 Hz), 140.9 (dtdd, *J*=231.9, 9.2, 4.6, 1.9 Hz), 138.6 (ddtd, *J*=235.9, 19.2, 10.6, 2.3 Hz), 123.7 (dtt, *J*=222.4, 14.8, 5.4 Hz), 54.4-54.3 (m, TMA) ppm. <sup>13</sup>C{<sup>1</sup>H} NMR (151 MHz, D<sub>2</sub>O) δ 142.0–141.7 (m), 140.8 (dm, *J*=231.6 Hz), 138.2 (dm, *J*=240.7 Hz), 129.8 (dm, *J*=232.4 Hz), 55.3–55.2 (m, TMA) ppm. <sup>19</sup>F{<sup>1</sup>H} (565 MHz, d-DMSO) δ -172.0–172.1 (m, 2F), -172.1–172.3 (m, 2F), -196.3–196.5 (m, 1F) ppm. FTIR (ATR)/cm<sup>-1</sup> ν = 3032.41 (w), 1690.86 (w), 1644.75 (w), 1599.17 (w), 1504.13 (s), 1487.98 (s), 1467.75 (s), 1248.42 (m), 1230.19 (m), 1167 (w), 1084.29 (w), 1046.34 (w), 1001.62 (s), 967.89 (s), 723.23 (w), 604.91 (w), 577.75 (w).

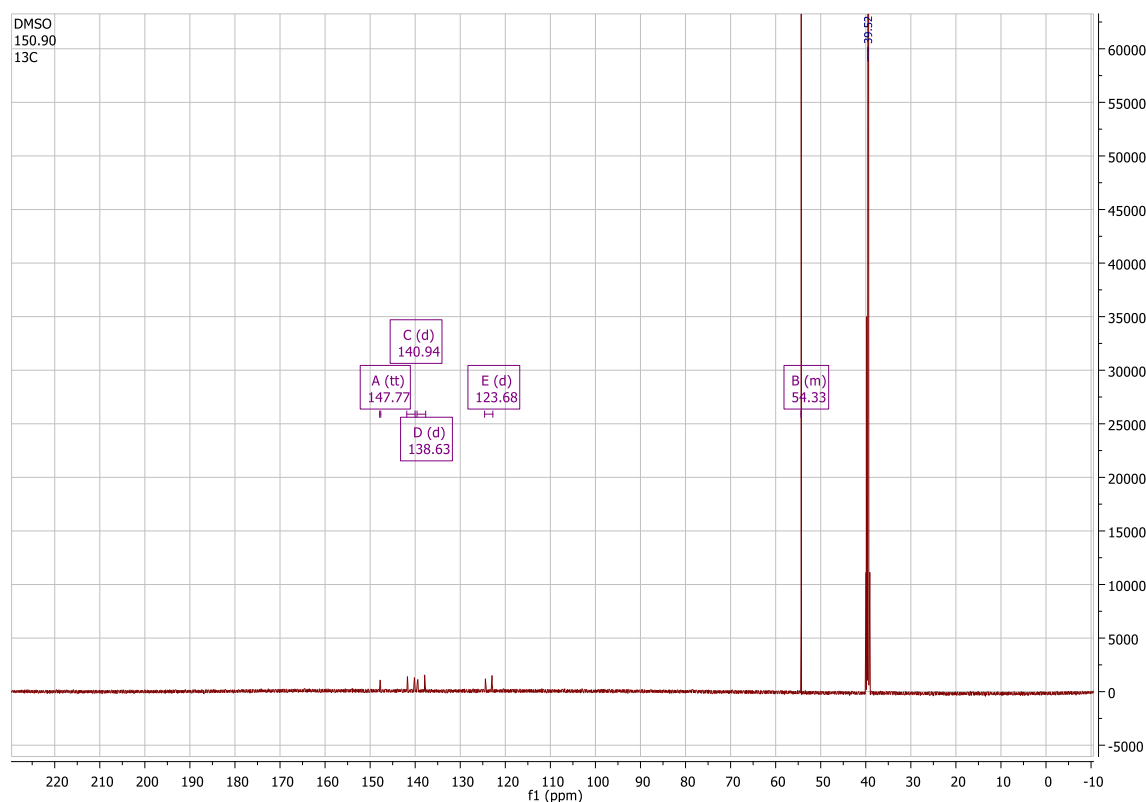

Figure S1: <sup>13</sup>C{<sup>1</sup>H} NMR of TMA pentafluorophenoxide in d-DMSO.

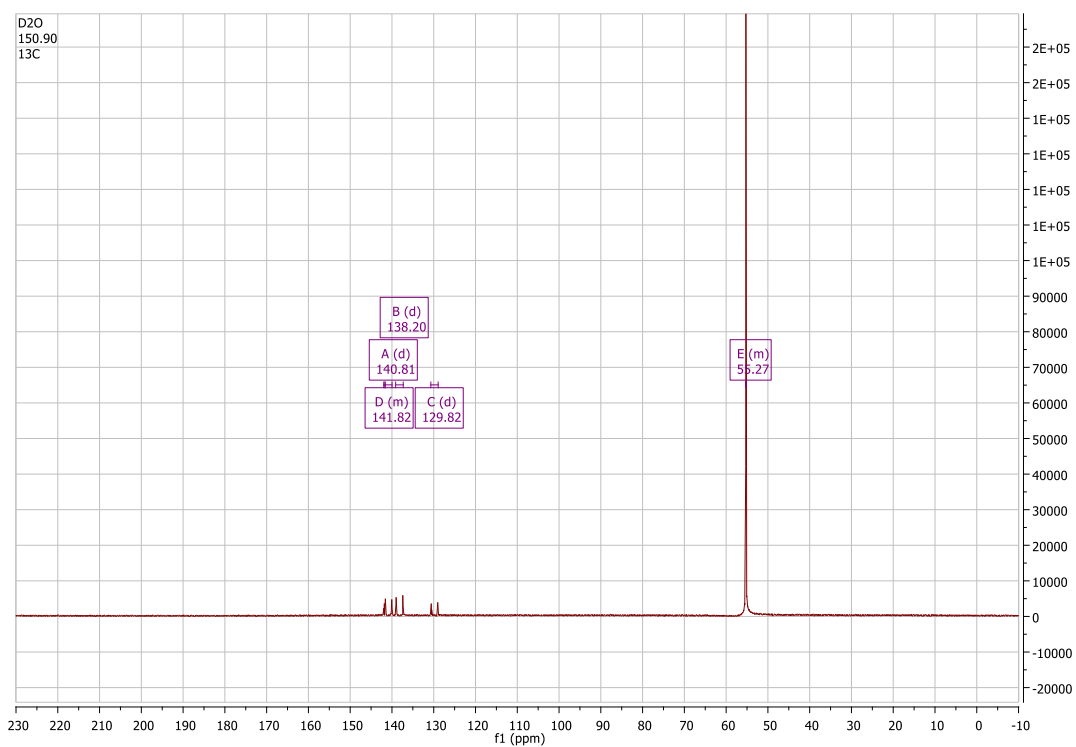

Figure S2:  $^{13}\text{C}\{^1\text{H}\}$  NMR of TMA pentafluorophenoxide in  $\text{D}_2\text{O}$ .

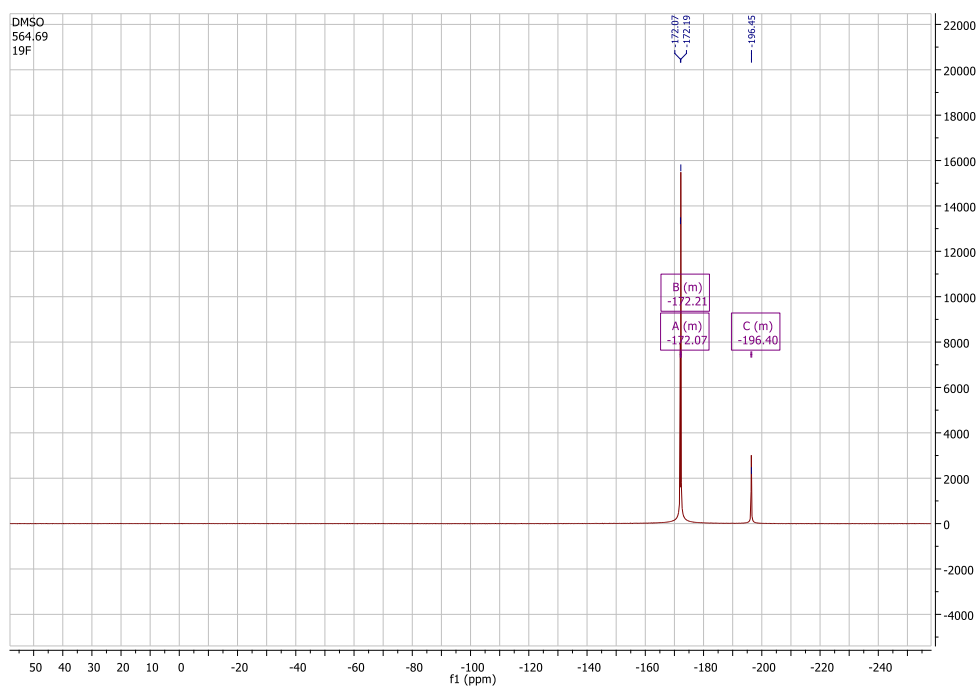

Figure S3:  $^{19}\text{F}\{^1\text{H}\}$  NMR of TMA pentafluorophenoxide in d-DMSO.

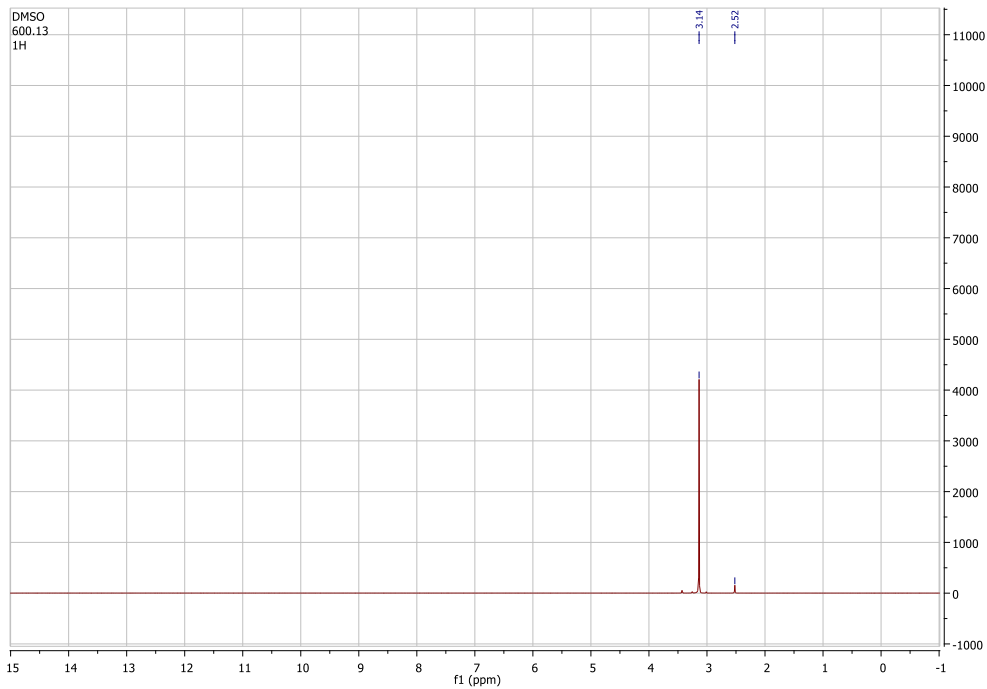

Figure S4:  $^1\text{H}$  NMR of TMA pentafluorophenoxide in d-DMSO.

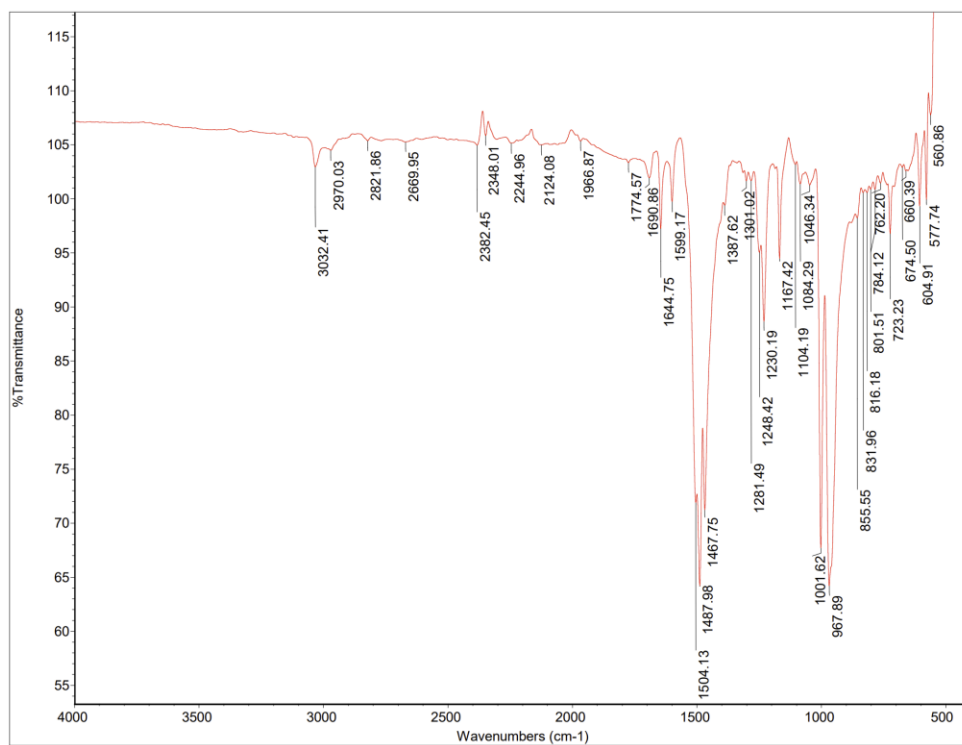

Figure S5: FTIR of TMA pentafluorophenoxide.

## CCSI assembly instructions

1. Clear Hood/Work Area

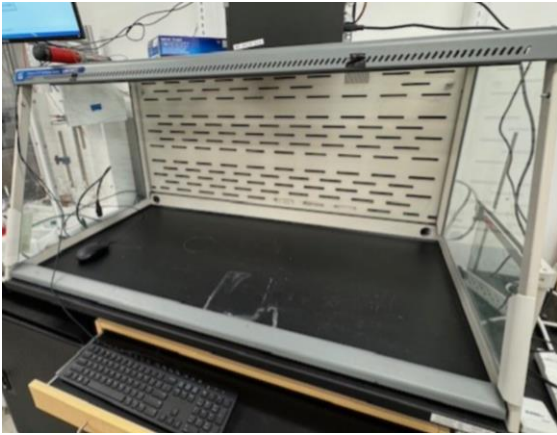

2. Place Breadboard

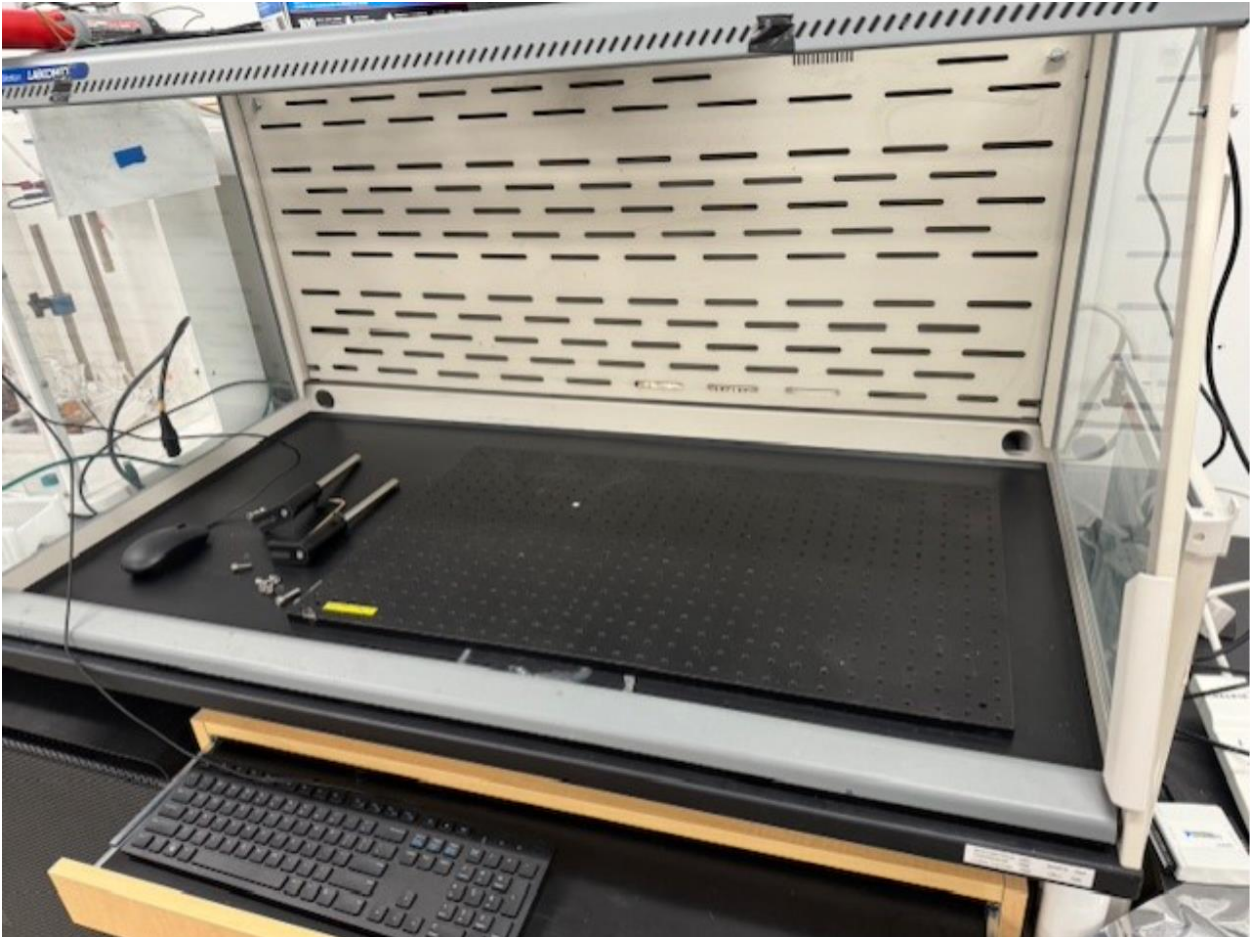

3. Wire Electrical Distribution Rack Ground and Relays, ensuring to observe proper polarity for both Control and Load signals.
4. Mount Main Chamber Panel (12"x12" panel) onto elevated standoffs

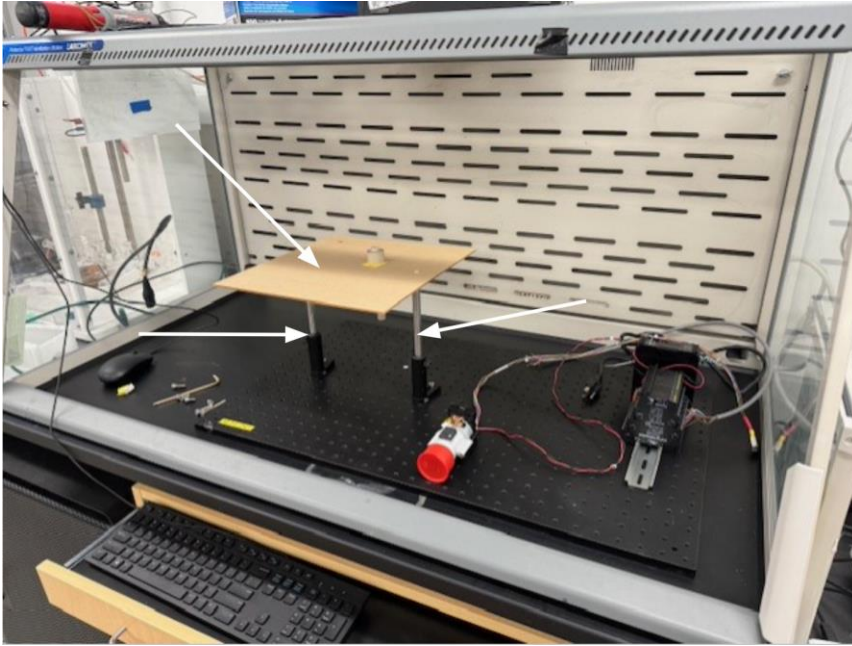

5. Insert REC Chamber into Panel and Install lower TEE as shown (REC Chamber → Tee Common port). Place Flow Selection Valve 6 on breadboard as shown. Connect the REC Chamber TEE into the Valve 6 Common as shown. Install PEEK tubing into Valve 6 A port as shown. Ensure the PEEK tubing is long enough to reach the designated Waste/Used repository.

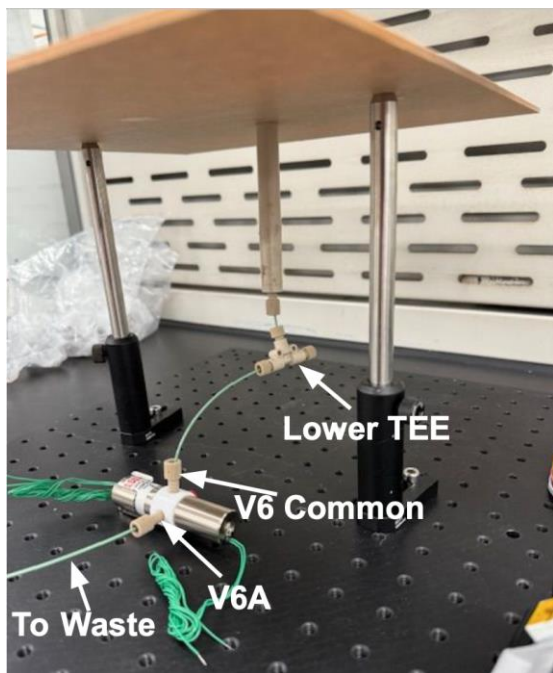

- Place switching valve V4 on the breadboard in approximate shown location. Connect V4 Common port to the REC Chamber Tee.

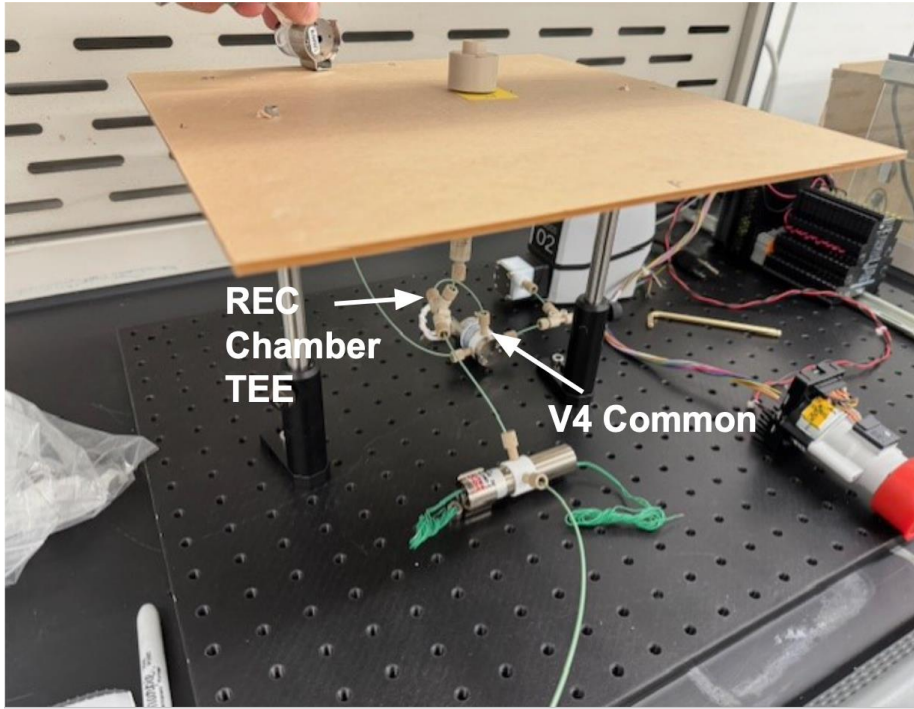

- Connect port V4A to the Pump Output TEE, as shown.

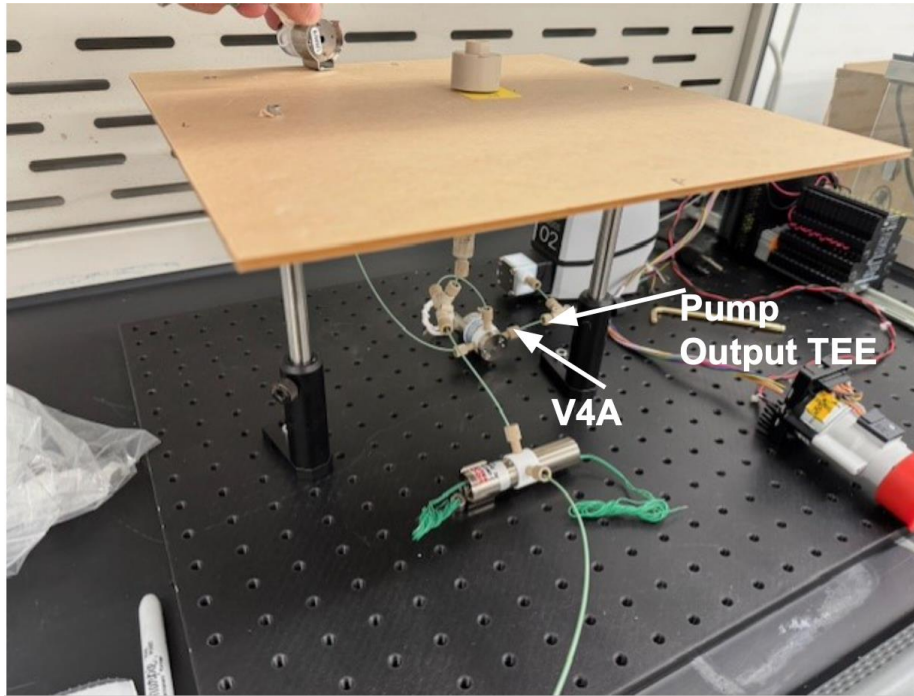

8. Connect the Pump Output Tee Common port to the output of the Diaphragm Pump, as shown. Place pump on breadboard in approximate location shown so that none of the fluidic connectors are strained/pulled from their housing.

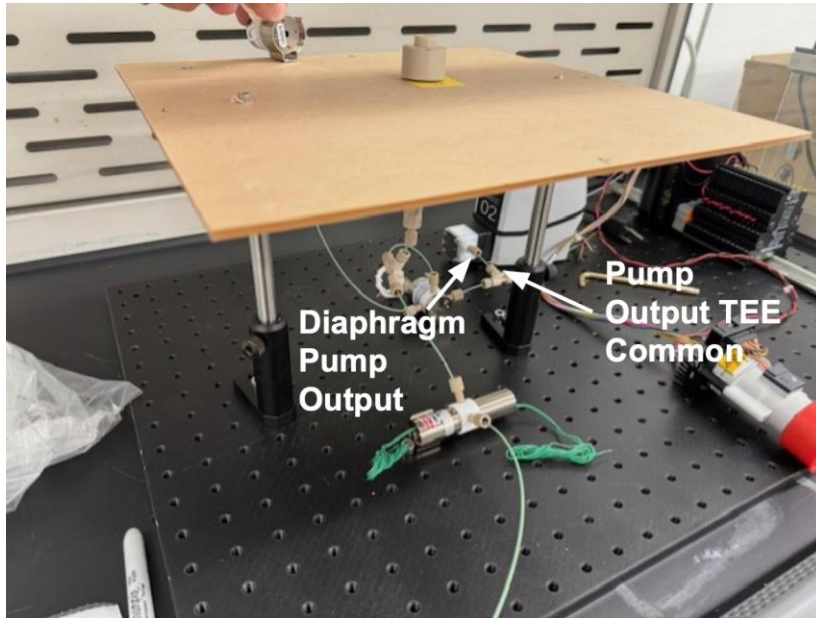

9. Mount Valves V1, V2, V3, V5, and V7 on the Main Panel in the approximate locations shown.

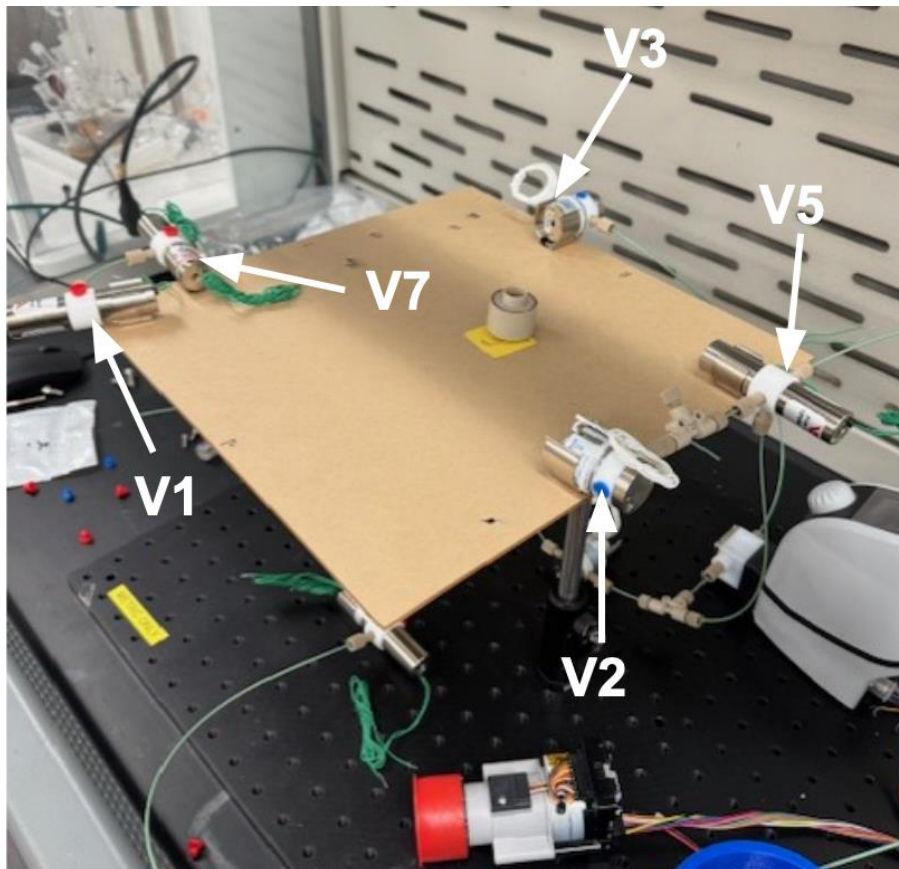

10. If no sorbent analyzer used, Connect port V4B to port V3B as shown. If using sorbent analyzer, Connect port V4B to Sorbent Analyzer Inlet, and Connect port V3B to Sorbent Analyzer Outlet.

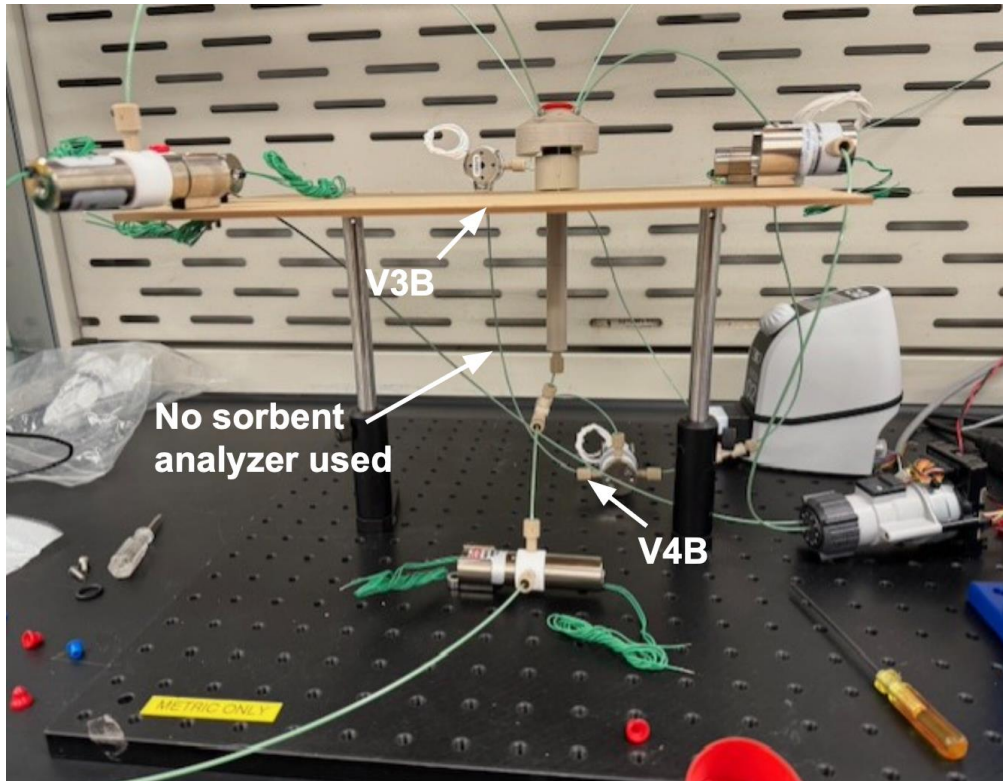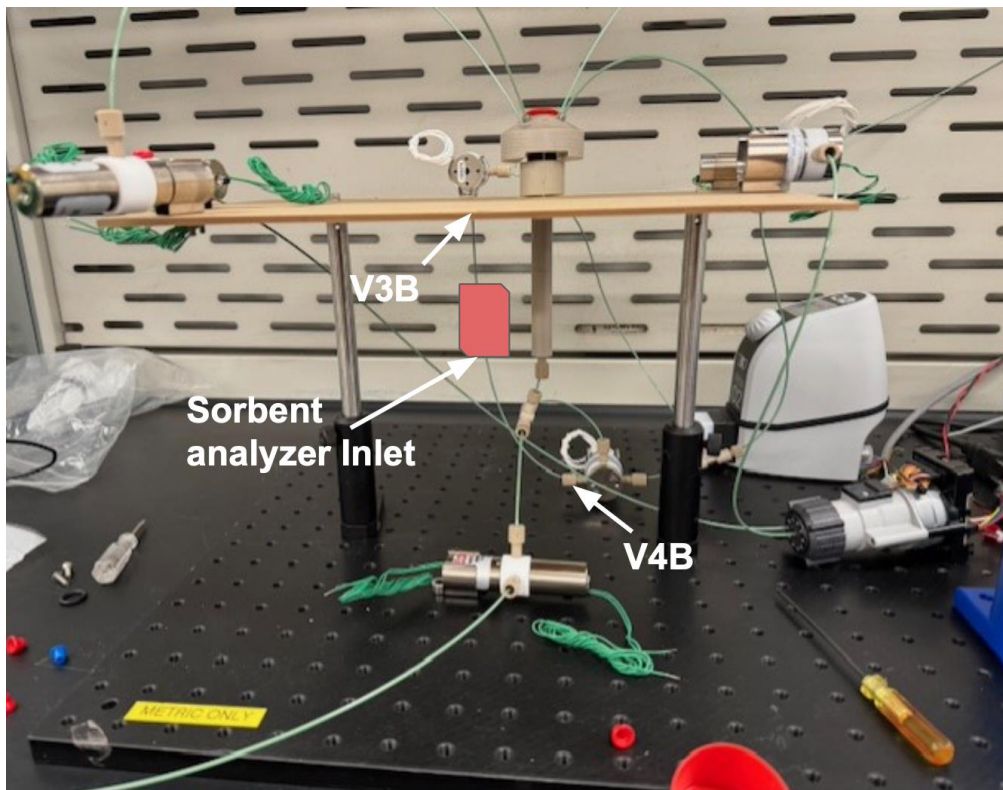



11. Connect port V3 Common to Diaphragm Pump Inlet

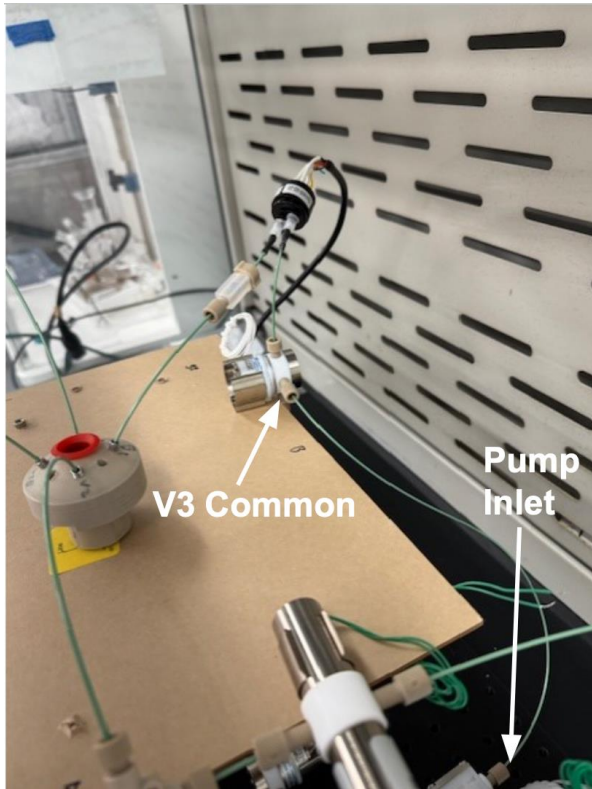

12. Connect Port V5 Common to the remaining Pump Outlet Tee Port

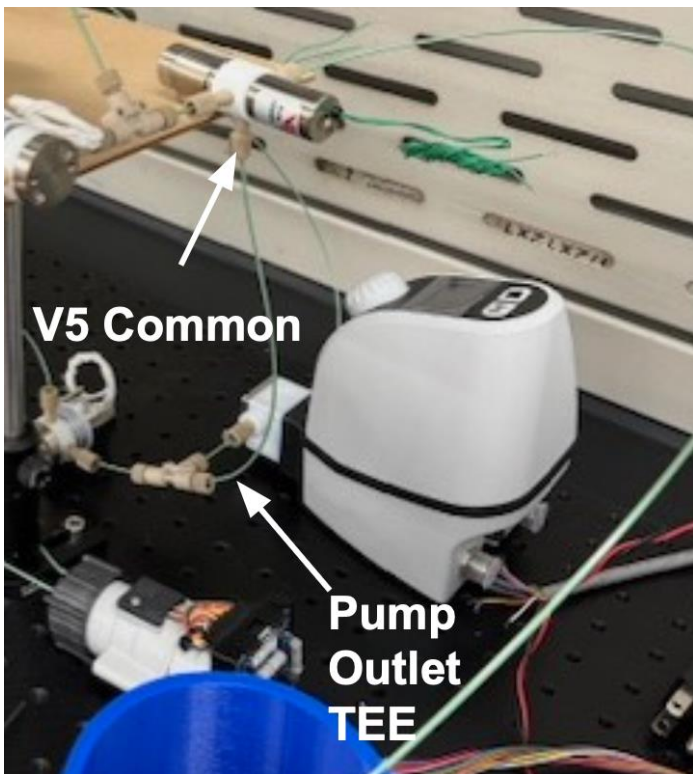

13. Connect port V5A to one end of the Return Loop TEE. Connect the other Return Loop TEE port to valve port V2 Outlet, as shown, leaving the Return Loop Tee Common open.

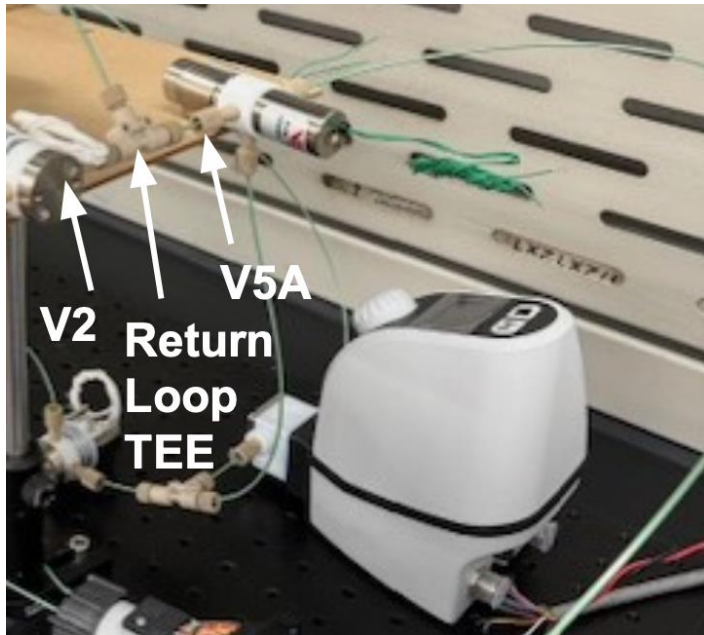

14. Connect Return Loop Tee Common port, and port V1B, to the REC Chamber Lid

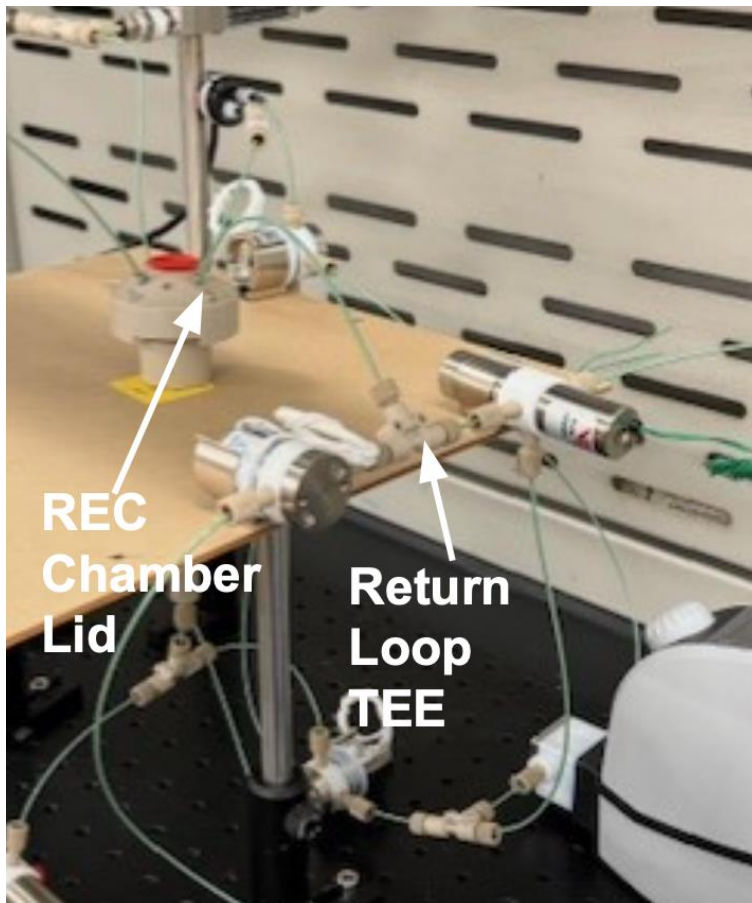

15. Connect V1 Common port to port V7A

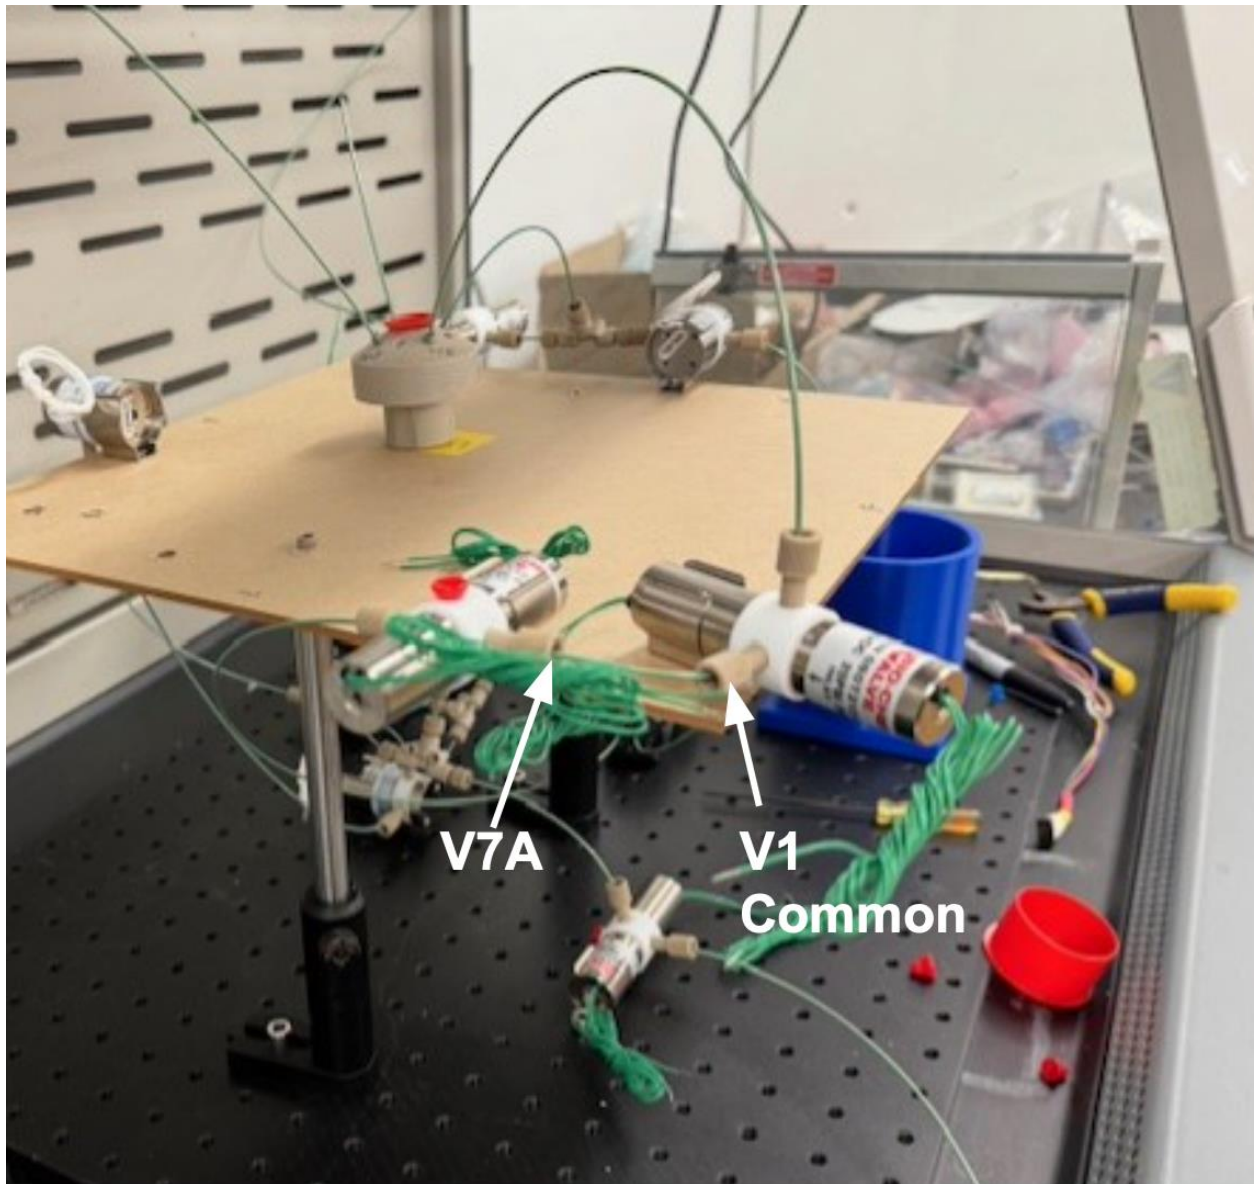

16. Connect port V7B to Flow Selection Valve Channel 4

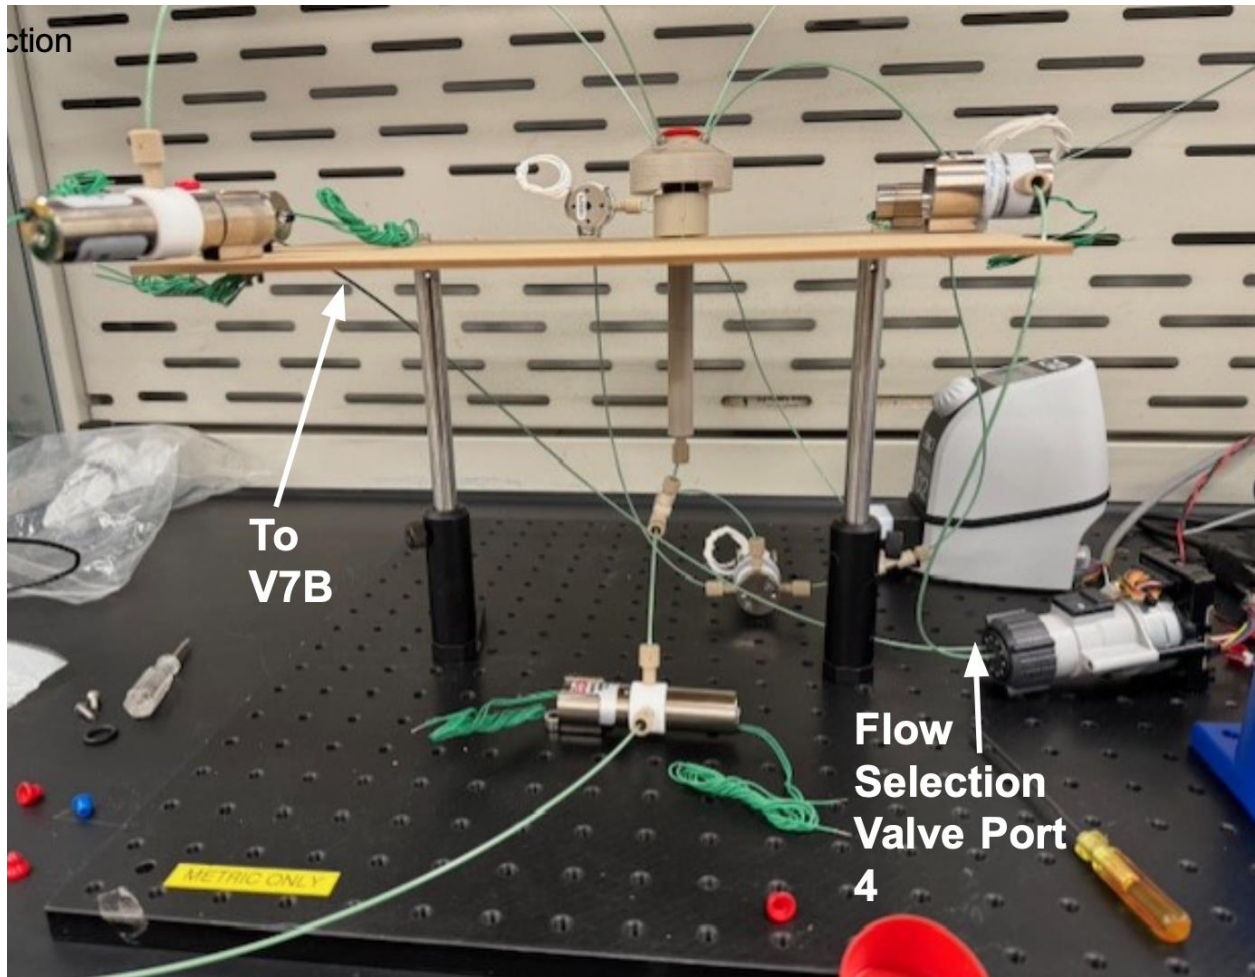

17. Connect port V2 Inlet to Flow Selection Valve Common Port (center port)

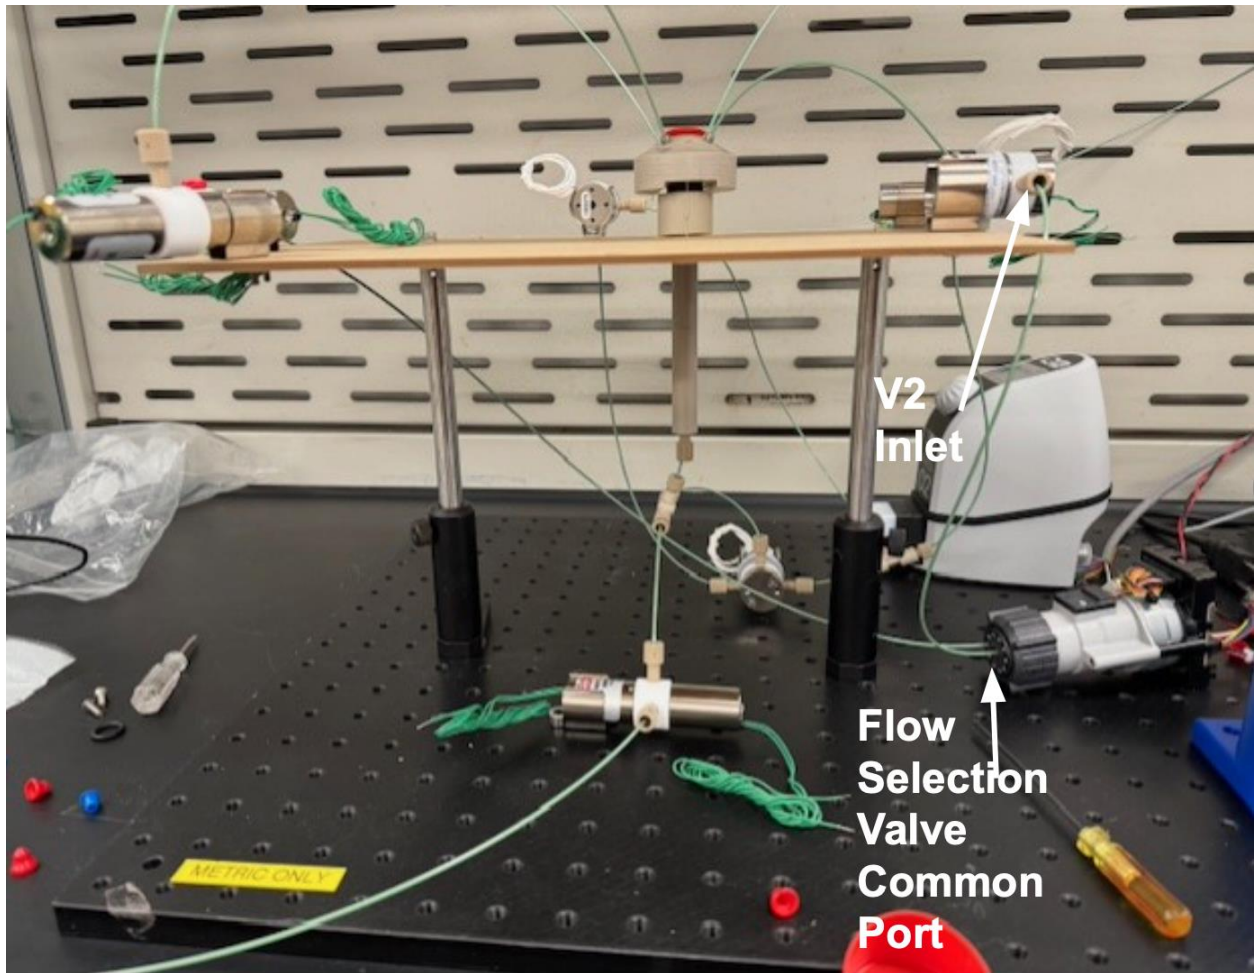

18. Connect pCO<sub>2</sub> inlet to REC Chamber Lid

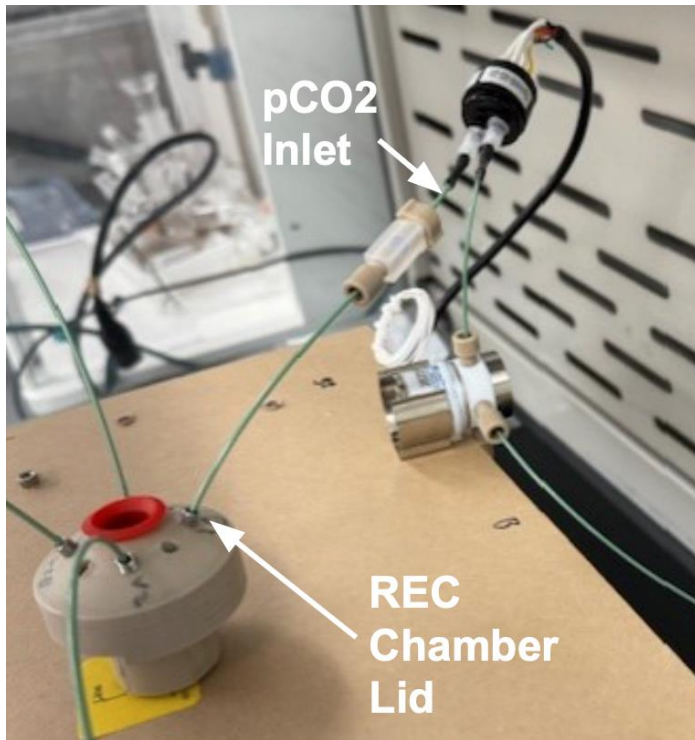

19. Connect pCO<sub>2</sub> outlet to port V3 Common

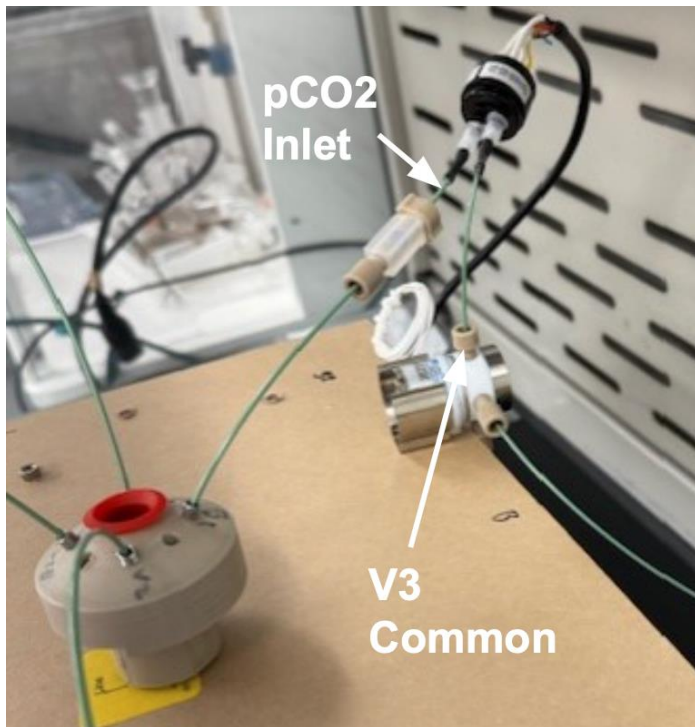

20. Configure MFC's such that they outlet into two ports of a TEE. Connect the remaining port of the Gas Metering TEE to the REC Chamber Lid

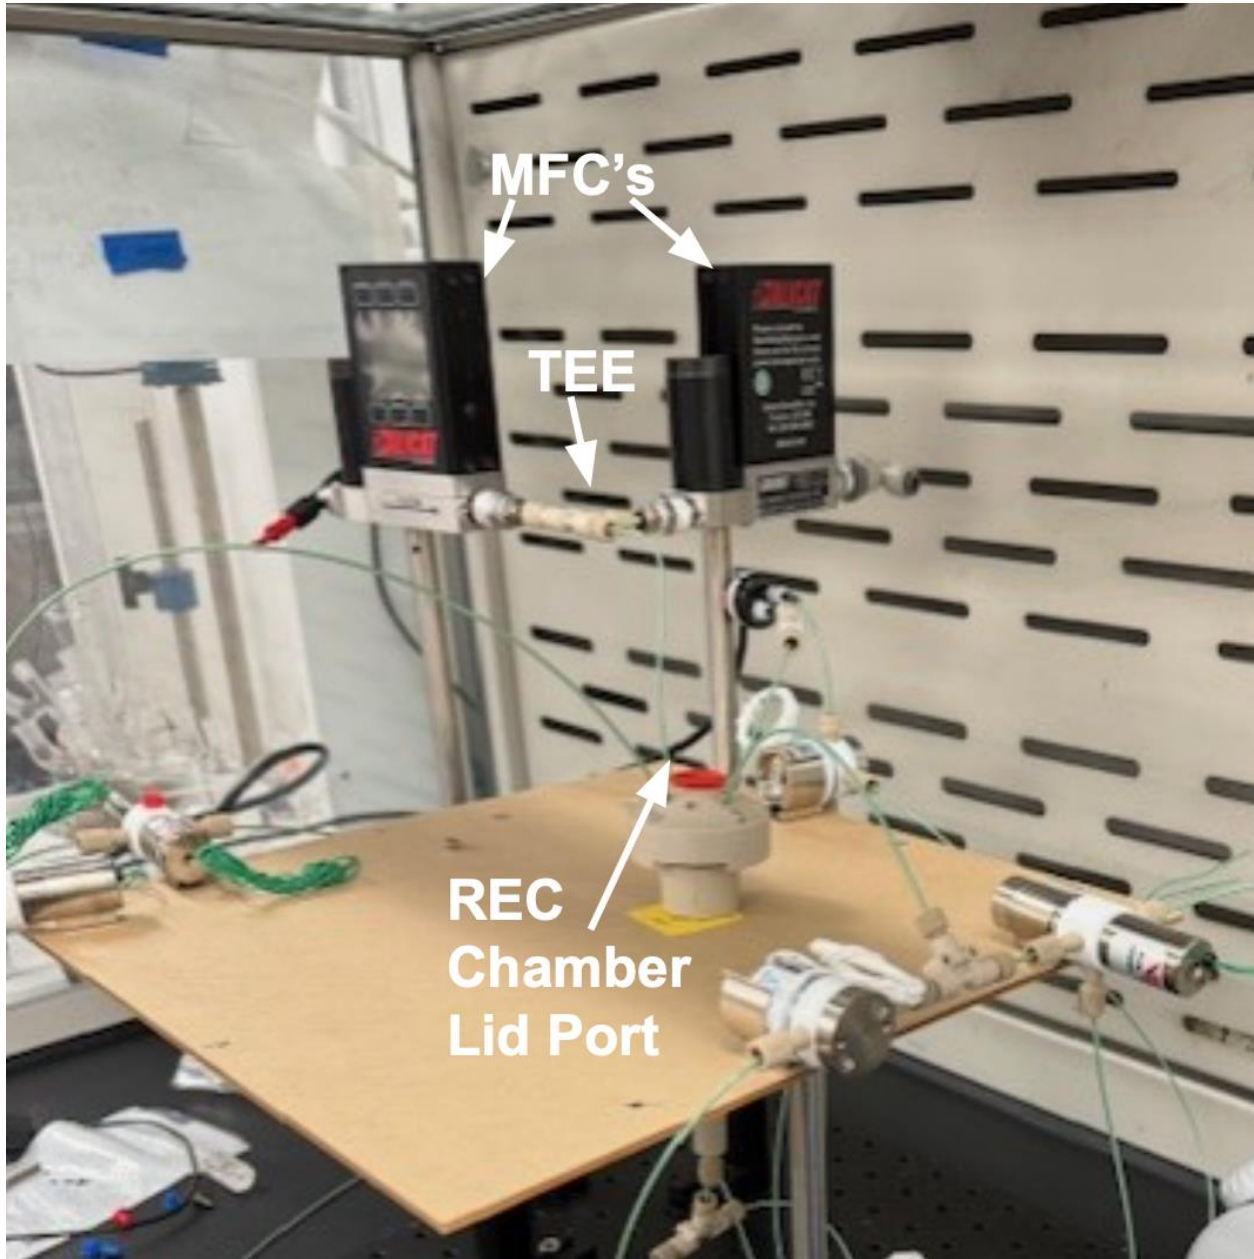

21. Route the tubes from V6A and V5B to the designated Waste/Used repository location to ensure they reach.

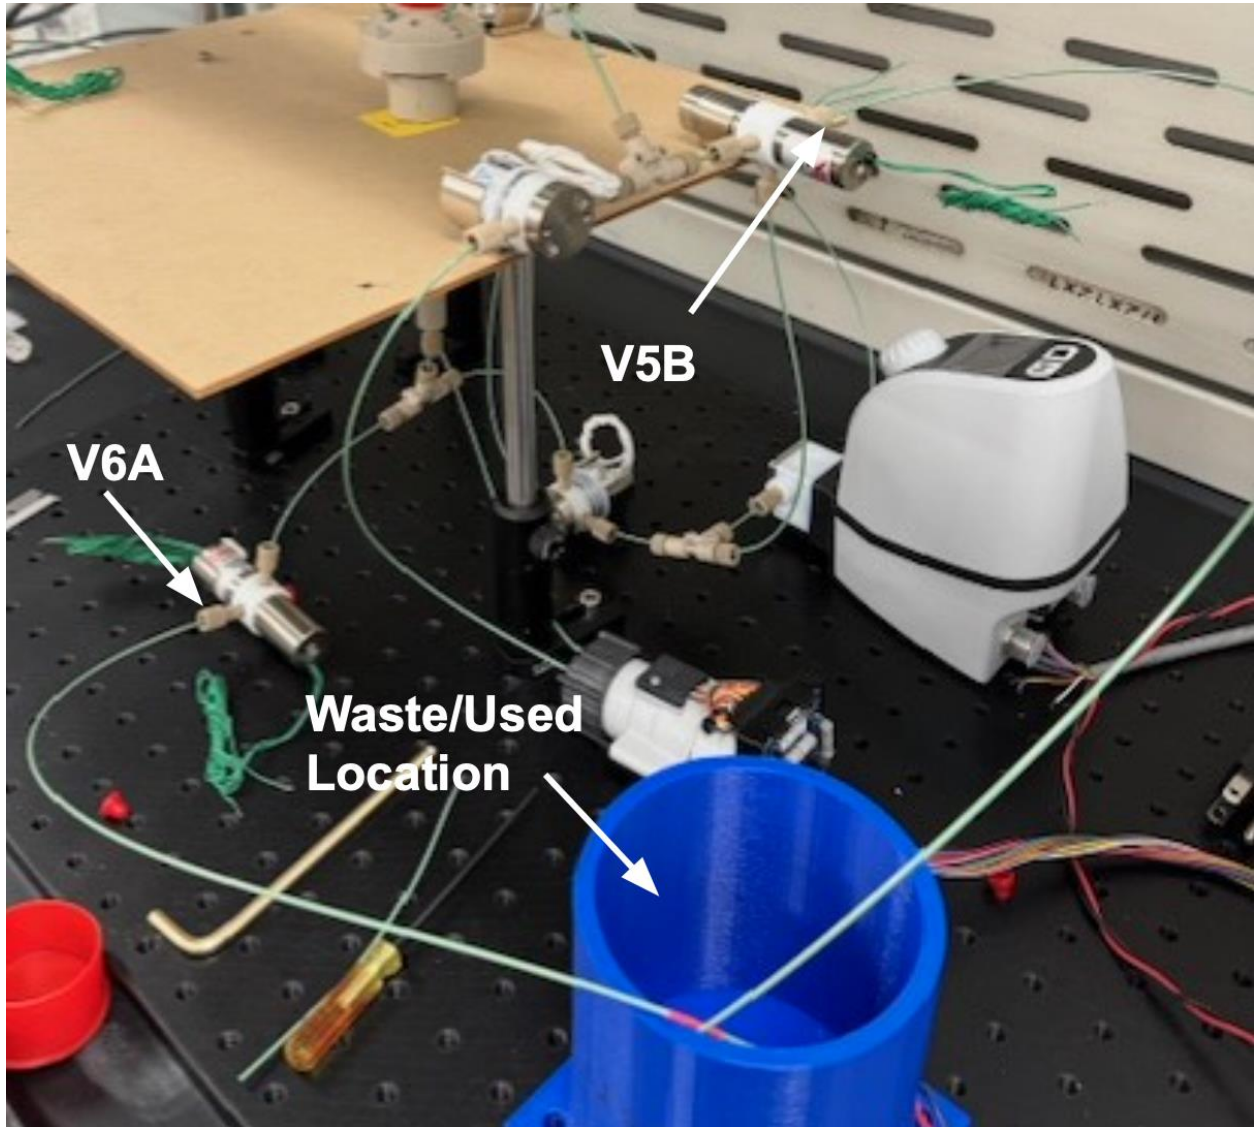



22. Wire all the valves to GROUND. Each valve has a pair of wires for electronic control. One wire from each pair is used to connect each valve to a common Ground, polarity is not consequential. As shown, the Omron 12V source Ground is wired to a Wago distribution panel, which allows all Valve Wires to connect to Ground simultaneously. Some wires may need to be extended if they do not reach the power distribution rack.

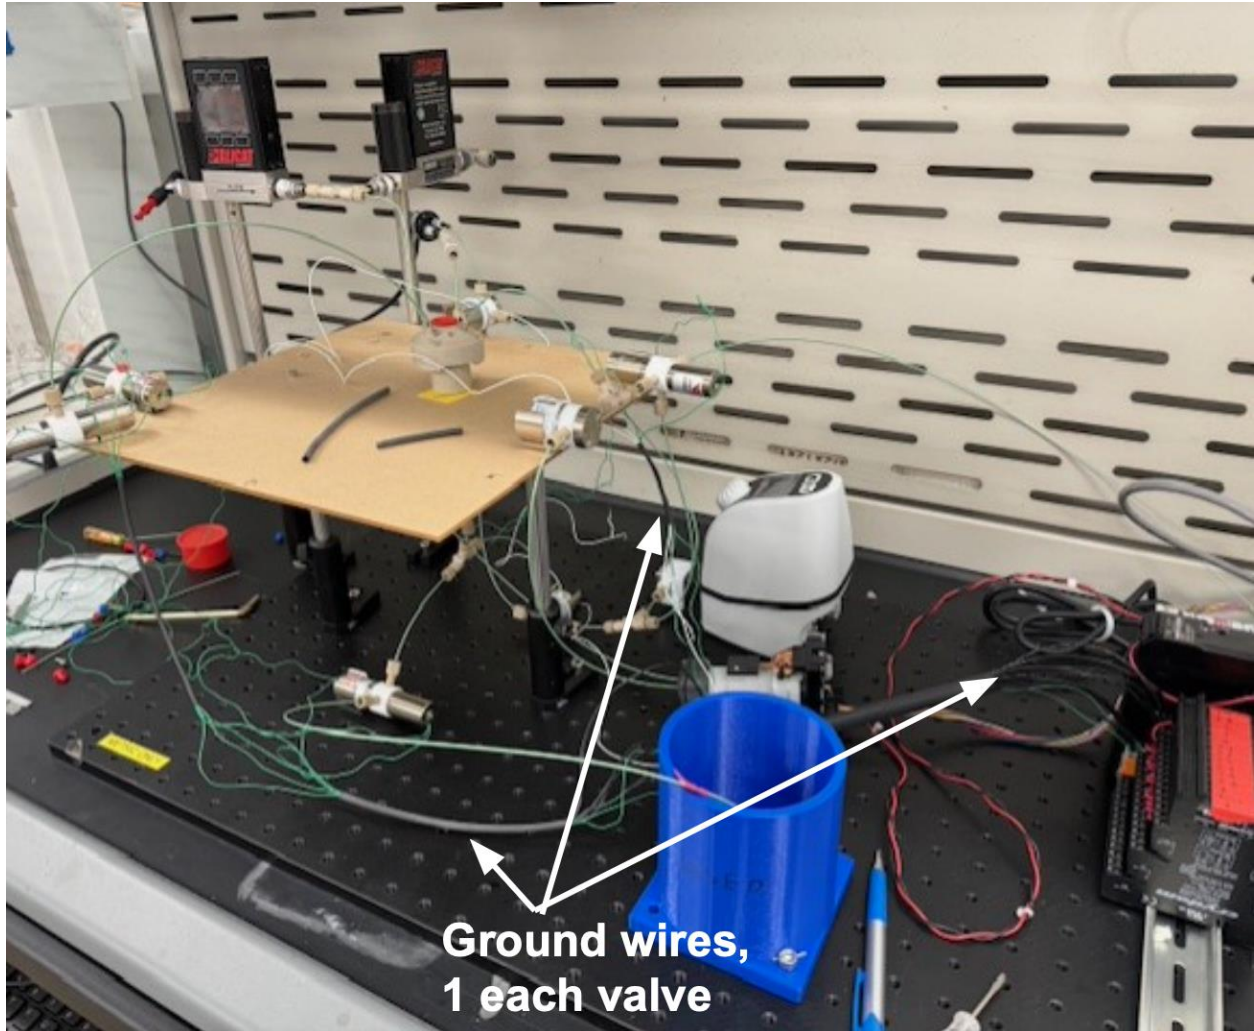

23. Wire all the Valves to their respective control relays. Each valve will have 1 wire available after connecting the other to ground (previous step). Ensure this free wire is connected to the proper control relay, observing relay load polarity to ensure proper function.

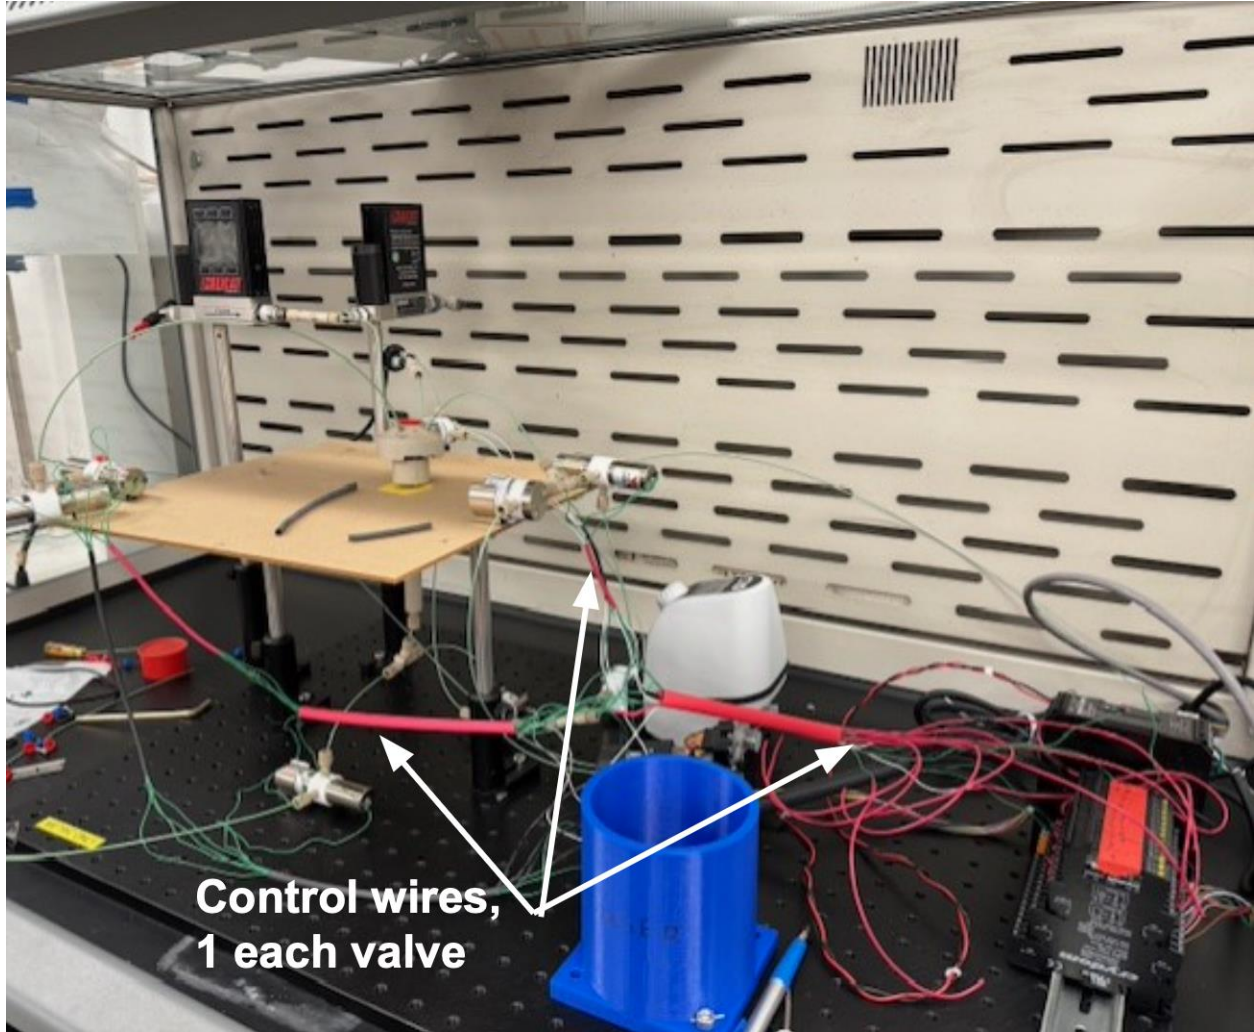

24. Plumb gas lines into the hood. Connect background gas to Valve port V7 Common. Connect Syringe Pumps to respective Multi Channel Valve Port

25. Test all valves and connections for leaks and proper functioning.

End of assembly instructions.

## **Additional guidance for assembly and diagnostics**

Replication of the CCSI instrumentation requires prerequisite knowledge of, and familiarity with, the constituent components. This body of knowledge includes, but is not limited to, their safe and proper usage, and any general operational considerations that can be found in the user manual of each component. Below we provide some techniques, tips, and tricks that can aid in the assembly and validation of the CCSI.

### *Syringes w/ Luer Lock Tips*

It is very helpful to be able to manually pressurize or evacuate the system without having to use high pressure gas cylinders or knock-out drum-coupled vacuum sources. The easiest way to do this is by using a syringe made of instrument compatible materials. For the demonstrated aqueous configuration, a 60 mL plastic syringe with rubber plunger was acceptable.

Syringes come with many types of tips for connecting to external tubing, but the authors have found those with Luer Lock (or similar twist lock systems) tips allow for the largest range of tube sizes and materials to be used. For the present work, the authors utilized barbed tip luer lock connectors to interface with Masterflex peristaltic pump tubing.

### *Flex Tubing (Including systems using solely hard tubing)*

As alluded to, flexible plastic or rubber tubing can be very useful in quickly connecting to, and disconnecting from, other types of tubing. In low pressure situations flex tubing can slip directly onto the outer diameter of hard plastic, or metal, tubing. Increased pressures may require using a barb/luer lock connector, or flaring the OD of the hard tubing. High Pressure applications usually are not suitable for flex tubing, and hard tubing with compression fittings is recommended. Chemical compatibility with sorbent media must also be considered.

### *Selection Valve Solenoid Direction*

Selection valves are comprised of any number of solenoid actuated diaphragm isolation valves connected in parallel to a common port. In the case of 3-way selection valves, the often-used symmetric port geometry can make the determination of which valve controls which port unclear. Determining which port is controlled by which solenoid is paramount for proper control wiring and ensuring safe operation of the instrument.

In the case of Normally Closed solenoid valves, applied pressure to the common port will not result in any flow. Thus, to test ambiguous port configurations, one only need apply pressure to the common port (e.g. via manually operated syringe pump compression) and sequentially open each unknown solenoid using an appropriate measurement method to detect flow. Common practice involves placing tubes in water and watching for which tube makes bubbles, indicating the port is controlled by the actuated solenoid valve.

### *CO<sub>2</sub> Meter Connection to Headspace Loop*

The CO<sub>2</sub> sensor reported here (SprintIR-6S) is delivered with a black housing that has two tapered ports for external connections to tubing. Most of the time, flexible tubing like that used in peristaltic pumps is sufficient for making airtight seals on the ports. In other cases, material compatibility may prevent the

use of flexible tubing, and so one must find a suitable way to connect hard tubing to the ports. The authors have found that the Luer Lock Socket style tube connectors snugly fits onto the ports. One must then find an acceptable method for mating the desired recirculation tubing to this Luer Lock Port.

For example, polyether ether ketone (PEEK) is a hard tubing with broad chemical resistance. It is also readily available and commonly used in the physical sciences, making it an attractive choice for building systems where chemical compatibility and contamination is paramount. PEEK tubing is also a choice material for chromatography systems, and there exists a wide range of available fluidic connectors for making seals between PEEK tubing and various vessels. A common port designation for these seals is the  $\frac{1}{4}$ "-28 Flat Bottom specification, allowing for tubing to be hermetically sealed to any vessel with this threading with the use of a specially designed nut-and-ferrule assembly. Thus, all one needs to do is use a Luer Lock Socket with  $\frac{1}{4}$ "-28 threading, and then utilize a Union Joint (common from HPLC suppliers) to connect to external recirculation tubing.



|                              |                                                                      |            |           |           |           |            |            |            |            |            |            |           |
|------------------------------|----------------------------------------------------------------------|------------|-----------|-----------|-----------|------------|------------|------------|------------|------------|------------|-----------|
| <i>H2O Syringe Inject</i>    | H2O Syringe Inject (Dead Volume + Clean Volume)                      |            |           |           |           |            |            |            |            |            |            |           |
| <i>Clear Liquid Valve</i>    | ON                                                                   | ON         | ON        | A         | A         | OFF        | OFF        | OFF        | OFF        | OFF        | ON         | OFF       |
| <i>wait</i>                  | wait= LiquidFillWait                                                 |            |           |           |           |            |            |            |            |            |            |           |
| <i>H2O Syringe Withdraw</i>  | H2O Syringe Withdraw (Retraction Volume)                             |            |           |           |           |            |            |            |            |            |            |           |
| <i>H2O Syringe Inject</i>    | H2O Syringe Inject (Backlash Volume)                                 |            |           |           |           |            |            |            |            |            |            |           |
| <i>Gas OFF</i>               | ON                                                                   | ON         | ON        | A         | A         | OFF        | OFF        | OFF        | OFF        | OFF        | OFF        | OFF       |
| <i>Liquid Valve Close</i>    | ON                                                                   | ON         | OFF       | A         | A         | OFF        | OFF        | OFF        | OFF        | OFF        | OFF        | OFF       |
| <i>Cell Seal</i>             | OFF                                                                  | OFF        | OFF       | A         | A         | OFF        | OFF        | OFF        | OFF        | OFF        | OFF        | OFF       |
| <i>Measure CO2</i>           | OFF                                                                  | OFF        | OFF       | A         | A         | OFF        | OFF        | OFF        | OFF        | OFF        | OFF        | ON        |
| <i>wait</i>                  | wait= WaitCO2MeasurementTime                                         |            |           |           |           |            |            |            |            |            |            |           |
| <i>Pump OFF</i>              | OFF                                                                  | OFF        | OFF       | A         | A         | OFF        | OFF        | OFF        | OFF        | OFF        | OFF        | OFF       |
| <i>Liquid Drain</i>          | OFF                                                                  | ON         | OFF       | A         | A         | OFF        | OFF        | ON         | OFF        | ON         | OFF        | OFF       |
| <i>wait</i>                  | wait= LiquidCleanPurge                                               |            |           |           |           |            |            |            |            |            |            |           |
| <i>Gas OFF</i>               | OFF                                                                  | OFF        | OFF       | A         | A         | OFF        | OFF        | ON         | OFF        | OFF        | OFF        | OFF       |
| <i>Seal Cell</i>             | OFF                                                                  | OFF        | OFF       | A         | A         | OFF        | OFF        | OFF        | OFF        | OFF        | OFF        | OFF       |
| <i>Syringe REFILL Prep</i>   | V8=B                                                                 |            |           |           |           |            |            |            |            |            |            |           |
| <i>H2O Syringe Withdraw</i>  | H2O Syringe Withdraw (Target Volume + Clean Volume +Backlash Volume) |            |           |           |           |            |            |            |            |            |            |           |
| <i>H2O Syringe Inject</i>    | H2O Syringe Inject (Backlash Volume)                                 |            |           |           |           |            |            |            |            |            |            |           |
| <i>Syringe Refill Finish</i> | V8=A                                                                 |            |           |           |           |            |            |            |            |            |            |           |
| <b><u>Headspace Fill</u></b> | <b>V1A</b>                                                           | <b>V1B</b> | <b>V2</b> | <b>V3</b> | <b>V4</b> | <b>V5A</b> | <b>V5B</b> | <b>V6A</b> | <b>V6B</b> | <b>V7A</b> | <b>V7B</b> | <b>P1</b> |
| <i>CO2 Line Dilute</i>       | OFF                                                                  | OFF        | OFF       | A         | A         | OFF        | OFF        | OFF        | OFF        | OFF        | OFF        | ON        |
| <i>wait</i>                  | wait= WaitCO2DilutionTime                                            |            |           |           |           |            |            |            |            |            |            |           |
| <i>Pump OFF</i>              | OFF                                                                  | OFF        | OFF       | A         | A         | OFF        | OFF        | OFF        | OFF        | OFF        | OFF        | OFF       |
| <i>HSmain purge</i>          | OFF                                                                  | ON         | OFF       | A         | A         | OFF        | OFF        | ON         | OFF        | ON         | OFF        | OFF       |
| <i>wait</i>                  | wait= HeadspacePurge                                                 |            |           |           |           |            |            |            |            |            |            |           |
| <i>Gas OFF</i>               | OFF                                                                  | OFF        | OFF       | A         | A         | OFF        | OFF        | ON         | OFF        | OFF        | OFF        | OFF       |

|           |     |     |     |   |   |     |     |     |     |     |     |     |
|-----------|-----|-----|-----|---|---|-----|-----|-----|-----|-----|-----|-----|
| Seal Cell | OFF | OFF | OFF | A | A | OFF |
|-----------|-----|-----|-----|---|---|-----|-----|-----|-----|-----|-----|-----|

The following procedure initializes the headspace using the primary process gas (9.9% CO<sub>2</sub> in the present work)

|                                                                                                  |                             |            |           |           |           |            |            |            |            |            |            |           |
|--------------------------------------------------------------------------------------------------|-----------------------------|------------|-----------|-----------|-----------|------------|------------|------------|------------|------------|------------|-----------|
| Notes: V8 used for water syringe refill. V9 selects Background Gas and is set prior to starting. |                             |            |           |           |           |            |            |            |            |            |            |           |
| <b>Step:</b> / State Description                                                                 | Valve States                |            |           |           |           |            |            |            |            |            |            |           |
| <b><u>Main Headspace Purge</u></b>                                                               | <b>V1A</b>                  | <b>V1B</b> | <b>V2</b> | <b>V3</b> | <b>V4</b> | <b>V5A</b> | <b>V5B</b> | <b>V6A</b> | <b>V6B</b> | <b>V7A</b> | <b>V7B</b> | <b>P1</b> |
| HSMain purge via V1-6                                                                            | OFF                         | ON         | OFF       | A         | A         | OFF        | OFF        | ON         | OFF        | OFF        | OFF        | OFF       |
| wait                                                                                             | wait= HSpurge1_duration     |            |           |           |           |            |            |            |            |            |            |           |
| HSMain purge via V2-6                                                                            | OFF                         | OFF        | ON        | A         | A         | OFF        | OFF        | ON         | OFF        | OFF        | ON         | OFF       |
| wait                                                                                             | wait= ManPurge1_duration    |            |           |           |           |            |            |            |            |            |            |           |
| Line purge via V2-5                                                                              | OFF                         | OFF        | ON        | A         | A         | OFF        | OFF        | ON         | OFF        | OFF        | OFF        | OFF       |
| wait                                                                                             | wait                        |            |           |           |           |            |            |            |            |            |            |           |
| Line purge via V2-5                                                                              | OFF                         | ON         | OFF       | A         | A         | ON         | ON         | OFF        | OFF        | ON         | OFF        | OFF       |
| wait                                                                                             | wait= AlphaPurge1_duration  |            |           |           |           |            |            |            |            |            |            |           |
| <b><u>AUX PROBE PURGE</u></b>                                                                    |                             |            |           |           |           |            |            |            |            |            |            |           |
| Aux Probe purge via V5                                                                           | ON                          | ON         | OFF       | B         | B         | OFF        | ON         | OFF        | OFF        | ON         | OFF        | OFF       |
| wait                                                                                             |                             |            |           |           |           |            |            |            |            |            |            |           |
| Pump On                                                                                          | ON                          | ON         | OFF       | B         | B         | OFF        | ON         | OFF        | OFF        | ON         | OFF        | ON        |
| wait                                                                                             | wait= ProbePurge1_Duration  |            |           |           |           |            |            |            |            |            |            |           |
| <b><u>pCO<sub>2</sub> SENSOR PURGE</u></b>                                                       |                             |            |           |           |           |            |            |            |            |            |            |           |
| pCO <sub>2</sub> Sensor purge via V5                                                             | ON                          | ON         | OFF       | B         | B         | OFF        | ON         | OFF        | OFF        | ON         | OFF        | ON        |
| wait                                                                                             | wait= SensorPurge1_duration |            |           |           |           |            |            |            |            |            |            |           |
| Pump Off and Equilibrate                                                                         | OFF                         | OFF        | OFF       | A         | A         | OFF        | OFF        | OFF        | OFF        | OFF        | OFF        | OFF       |
| <b><u>Dilution purge</u></b>                                                                     |                             |            |           |           |           |            |            |            |            |            |            |           |











|                              |                                                                                   |     |     |   |   |     |     |     |     |     |     |     |
|------------------------------|-----------------------------------------------------------------------------------|-----|-----|---|---|-----|-----|-----|-----|-----|-----|-----|
| <i>Valve Prep</i>            | ON                                                                                | ON  | ON  | A | A | OFF |
| <i>MCVset</i>                | MCV=H2O                                                                           |     |     |   |   |     |     |     |     |     |     |     |
| <i>H2O Inject</i>            | H2O Syringe Inject                                                                |     |     |   |   |     |     |     |     |     |     |     |
| <i>wait</i>                  | Wait= liquidPressureEqualization                                                  |     |     |   |   |     |     |     |     |     |     |     |
| <i>MCVset</i>                | MCV= GAS                                                                          |     |     |   |   |     |     |     |     |     |     |     |
| <i>Clear MCV</i>             | ON                                                                                | ON  | ON  | A | A | OFF | OFF | OFF | OFF | OFF | ON  | OFF |
| <i>wait</i>                  | wait= LiquidFillwait                                                              |     |     |   |   |     |     |     |     |     |     |     |
| <i>Gas OFF</i>               | ON                                                                                | ON  | ON  | A | A | OFF |
| <i>wait</i>                  | wait= pressureEqualization                                                        |     |     |   |   |     |     |     |     |     |     |     |
| <i>MCVset</i>                | MCV=CLOSED                                                                        |     |     |   |   |     |     |     |     |     |     |     |
| <i>Liquid Valve Close</i>    | ON                                                                                | ON  | OFF | A | A | OFF |
| <i>Cell Seal</i>             | OFF                                                                               | OFF | OFF | A | A | OFF |
| <i>Measure CO2</i>           | OFF                                                                               | OFF | OFF | A | A | OFF | OFF | OFF | OFF | OFF | OFF | ON  |
| <i>wait</i>                  | wait= WaitCO2MeasurementTime                                                      |     |     |   |   |     |     |     |     |     |     |     |
| <i>Pump OFF</i>              | OFF                                                                               | OFF | OFF | A | A | OFF |
| <i>Liquid Drain</i>          | OFF                                                                               | ON  | OFF | A | A | OFF | OFF | ON  | OFF | ON  | OFF | OFF |
| <i>wait</i>                  | wait= LiquidCleanPurge                                                            |     |     |   |   |     |     |     |     |     |     |     |
| <i>Gas OFF</i>               | OFF                                                                               | OFF | OFF | A | A | OFF | OFF | ON  | OFF | OFF | OFF | OFF |
| <i>Seal Cell</i>             | OFF                                                                               | OFF | OFF | A | A | OFF |
| <i>Syringe REFILL Prep</i>   | V8=B                                                                              |     |     |   |   |     |     |     |     |     |     |     |
| <i>H2O Syringe Withdraw</i>  | H2O Syringe Withdraw                                                              |     |     |   |   |     |     |     |     |     |     |     |
| <i>H2O Syringe Inject</i>    | H2O Syringe Inject (Backlash Volume)                                              |     |     |   |   |     |     |     |     |     |     |     |
| <i>Syringe Refill Finish</i> | V8=A                                                                              |     |     |   |   |     |     |     |     |     |     |     |
| <b><u>Continue?</u></b>      | If Sample Remaining = Yes<br>GOTO <b><u>Headspace Fill*</u></b><br>Else<br>FINISH |     |     |   |   |     |     |     |     |     |     |     |

## CCSI automation in helao-async

### *HELAO Environment Setup (tested on Windows 7 x64)*

1. Unzip “helao\_code/helao-async” and “helao\_code/helao-core” from the zip archive to a local directory. The two repositories must be colocated for the setup script to function properly.
2. Install miniconda3 from <https://docs.conda.io/projects/miniconda/en/latest/index.html>
3. Open a miniconda command prompt and change directory to the unzipped “helao-async” path.
4. Run “setup\_env.bat from” the command prompt to install the python environment packages listed in “helao\_pinned\_win-64.yml”
5. Run “conda activate helao” to activate the newly installed environment.
6. The unzipped code folders are not valid git repositories, but HELAO integrates version tracking using git commit hashes. For this demonstration, initialize local git repositories by running “git init” from the “helao-async” and “helao-core” directories.

### *Edit the instrument configuration file*

1. Open “helao-async/helao/configs/ccsi1.yml” for editing
2. CCSI-specific experiments (“helao-async/helao/experiments/CCSI\_exp.py”) and sequences (“helao-async/helao/sequences/CCSI\_seq.py”) are loaded from lines 4 and 10 respectively. Update these paths as needed for new/modified code.
3. Modify line 15 “root: C:\INST\_hlo” to the desired save location for data and instrument logs.
4. Under the “servers” group, modify all “host” key values to the local machine’s domain name, external address, or internal address. Local address 127.0.0.1 may be used to restrict access to the host machine.
5. Under the “servers/IO” subgroup, modify line 32 “galil\_ip\_str” to the Galil DMC-41x3 I/O controller’s IP address.
6. Under the “servers/NI” subgroup, modify the “cDAQ1Mod1/port0/line\*” values to match valve-terminal wiring on the NI DAQ board.
7. Under the “servers/CO2SENSOR” subgroup, modify line 102 “port: COM9” to the correct COM port for the SprintIR-6S 20% CO2 Sensor.
8. Under the “servers/SYRINGE\*” subgroups, modify lines 111 and 122 “port” key values to the correct COM ports for the KDS Scientific Legato 100 syringe pumps (SYRINGE0 for the adsorbent solution, SYRINGE1 for cleaning solution).
9. Under the “servers/MFC” subgroup, modify line 135 “port: COM7” to the correct COM port for the Alicat Scientific MC-05SCCM-D mass flow controller.
10. Comment out or remove the “servers/DB” group to disable automatic data upload to AWS.

### *Launch HELAO using the ccsi1 configuration file*

1. Open a miniconda command prompt and run “conda activate helao” to activate the conda environment.
2. Change directory to the unzipped “helao-async” path.
3. Start the HELAO launcher script by running “helao.bat ccsi1” which will launch processes for device API servers (action servers), the scheduler API server (orchestrator), visualizers, and web UI (operator).

*Using the web UI operator to setup, queue, and start a CCSI initialization sequence*

1. The “CCSI\_initialization” sequence prepares the instrument for subsequent measurements by purging the cell headspace with CO<sub>2</sub> to a predefined level.
2. Open a web browser and browse to “[http://host\\_address:5002](http://host_address:5002)” where “host\_address” is the value specified under the “servers/ORCH” subgroup’s host key in the edited ccsi1.yml configuration file.
3. Under the “Sequence Selection” tab, choose “CCSI\_initialization” from the dropdown list. Modify sequence parameters as desired.
4. Click “Append seq to exp plan” to add the sequence to the planning buffer.
5. Scroll down to the “Orchestrator” section to review experiments listed in the sequence planning buffer.
6. Click “Add exp plan” to send the planning buffer to the HELAO orchestrator’s sequence queue.
7. Click “Start Orch” to begin processing the orchestrator queue.

**Bill of materials, total estimated cost, 12,941 to 15,759 USD**

| Category                       | Item                                                           | Detail                                          | Quantity | Price (2023 estimate, USD) | Notes/Links                                                                                                                                                                                                                                                                                                                                                                                                                                                                                                                                                       |
|--------------------------------|----------------------------------------------------------------|-------------------------------------------------|----------|----------------------------|-------------------------------------------------------------------------------------------------------------------------------------------------------------------------------------------------------------------------------------------------------------------------------------------------------------------------------------------------------------------------------------------------------------------------------------------------------------------------------------------------------------------------------------------------------------------|
| <b>Echem Cell Fabrication</b>  | Materials for Electrodes (Pt, glassy carbon, Membranes etc...) |                                                 | 1        | 450.00                     |                                                                                                                                                                                                                                                                                                                                                                                                                                                                                                                                                                   |
|                                | Recirculation Cap                                              |                                                 | 1        | 500.00                     |                                                                                                                                                                                                                                                                                                                                                                                                                                                                                                                                                                   |
|                                | Recirculation Chamber                                          |                                                 | 1        | 500.00                     |                                                                                                                                                                                                                                                                                                                                                                                                                                                                                                                                                                   |
| <b>Mounting / Construction</b> | 80/20 Railings (To mount Sorbent Analyzer and Frame)           |                                                 | 1        | 200.00                     | 4x 1.5x3x12, 2x 1.5x1.5x12, 1x 1.5x3x24                                                                                                                                                                                                                                                                                                                                                                                                                                                                                                                           |
|                                | 80/20 Brackets and Fasteners                                   |                                                 | 1        | 50.00                      | 4 Each Single and Double Brackets w/ fasteners                                                                                                                                                                                                                                                                                                                                                                                                                                                                                                                    |
|                                | 12x12 mounting surface                                         |                                                 | 1        | 8.46                       | <a href="https://www.mcmaster.com/8560K191/">https://www.mcmaster.com/8560K191/</a>                                                                                                                                                                                                                                                                                                                                                                                                                                                                               |
|                                | Mounting Hardware Machining                                    |                                                 | 1        | 100.00                     |                                                                                                                                                                                                                                                                                                                                                                                                                                                                                                                                                                   |
| <b>Gas Management/ Control</b> | Alicat MFC                                                     |                                                 | 2        | 2,500.00                   | Custom quoted MFC depends on target gas composition and desired pressure ranges.                                                                                                                                                                                                                                                                                                                                                                                                                                                                                  |
|                                | Fluid valves (3 way Selection Valves, BioChem)                 | 080T312-62-5                                    | 4        | 1,740.72                   | Various Suppliers. Arcmed quoted the present system components                                                                                                                                                                                                                                                                                                                                                                                                                                                                                                    |
|                                | Fluid Valves (3-Way Switching Valves, NResearch)               | <a href="#">HP225T031</a>                       | 3        | 284.67                     | <a href="#">HP225T031</a>                                                                                                                                                                                                                                                                                                                                                                                                                                                                                                                                         |
|                                | Flat bottom fittings with Ferrules                             | Cost from cole parmer for fittings with ferrule | 25       | 137.50                     | <a href="https://www.coleparmer.com/i/index-flangeless-fitting-standard-knurl-natural-peek-1-16-od-tubing-1-4-28-flat-bottom-10-pk/0202077?PubID=UX&amp;persist=true&amp;ip=no&amp;qclid=CjwKCAiAjPyfBhBMEiwAB2CCIk7-9zfrcQEInCNRwiky4puqplawSaUVcucikgWSj9MkhAnAPnSRoCabCQAvD_BwE">https://www.coleparmer.com/i/index-flangeless-fitting-standard-knurl-natural-peek-1-16-od-tubing-1-4-28-flat-bottom-10-pk/0202077?PubID=UX&amp;persist=true&amp;ip=no&amp;qclid=CjwKCAiAjPyfBhBMEiwAB2CCIk7-9zfrcQEInCNRwiky4puqplawSaUVcucikgWSj9MkhAnAPnSRoCabCQAvD_BwE</a> |
|                                | Alicat Power Cables                                            |                                                 | 2        | 110.00                     |                                                                                                                                                                                                                                                                                                                                                                                                                                                                                                                                                                   |
|                                | Recirculation pump                                             | Peristaltic pump OR Diaphragm pump              | 1        | 1,018.00 OR 3,836.00       | <a href="https://us.vwr.com/store/item/NA5192314/masterflex-c-l-analog-variable-speed-pump-systems-with-single-channel-pump-head-avantor">https://us.vwr.com/store/item/NA5192314/masterflex-c-l-analog-variable-speed-pump-systems-with-single-channel-pump-head-avantor</a><br>OR<br><a href="https://knf.com/en/us/solutions/laboratory-equipment/details/simdos-02-fem-102-rc-p">https://knf.com/en/us/solutions/laboratory-equipment/details/simdos-02-fem-102-rc-p</a>                                                                                      |

|                                   |                                                        |                   |    |          |                                                                                                                                                                                                                                                                                                                                   |
|-----------------------------------|--------------------------------------------------------|-------------------|----|----------|-----------------------------------------------------------------------------------------------------------------------------------------------------------------------------------------------------------------------------------------------------------------------------------------------------------------------------------|
| <b>Liquid Management/ Control</b> | Tubing/tubing for organic solvent                      | 25ft/pack         | 2  | 177.00   | Green PEEK tubing: MMC# 51085K48                                                                                                                                                                                                                                                                                                  |
|                                   | PEEK Tees and chemically compatible fluidic connectors | Tees, fittings    | 4  | 185.60   | <a href="https://www.coleparmer.com/i/index-low-pressure-tee-assembly-natural-peek-0-040-bore-1-16-od-tubing-1-4-28-flat-bottom-1-ea/0201432#eb-item-specification">https://www.coleparmer.com/i/index-low-pressure-tee-assembly-natural-peek-0-040-bore-1-16-od-tubing-1-4-28-flat-bottom-1-ea/0201432#eb-item-specification</a> |
|                                   | Switching Valve                                        | MLP778-606        | 1  | 1,000.00 | <a href="https://www.biotechfluidics.com/product/titanextm-10-position11-port-with-pcb-2/#tab-description">https://www.biotechfluidics.com/product/titanextm-10-position11-port-with-pcb-2/#tab-description</a>                                                                                                                   |
|                                   | Chemically Compatible O-rings                          |                   | 2  | 10.00    | <a href="https://www.mcmaster.com/9452K111/">https://www.mcmaster.com/9452K111/</a>                                                                                                                                                                                                                                               |
| <b>Computer/ Electronics</b>      | Computer                                               |                   | 1  | 750.00   |                                                                                                                                                                                                                                                                                                                                   |
|                                   | 5V Power Supply                                        | Omron S8VK-G03005 | 1  | 76.61    | <a href="https://www.digikey.com/en/products/detail/omron-automation-and-safety/S8VK-G03005/4079540">https://www.digikey.com/en/products/detail/omron-automation-and-safety/S8VK-G03005/4079540</a>                                                                                                                               |
|                                   | 12V Power Supply                                       | Omron S8VK-G06012 | 1  | 89.06    | <a href="https://www.digikey.com/en/products/detail/omron-automation-and-safety/S8VK-G06012/3929120">https://www.digikey.com/en/products/detail/omron-automation-and-safety/S8VK-G06012/3929120</a>                                                                                                                               |
|                                   | 24V Power Supply                                       | Omron S8VK-C12024 | 1  | 83.31    | <a href="https://www.digikey.com/en/products/detail/omron-automation-and-safety/S8VK-C12024/4987817">https://www.digikey.com/en/products/detail/omron-automation-and-safety/S8VK-C12024/4987817</a>                                                                                                                               |
|                                   | Wago Distribution Panels                               | 2946-2001-1401-ND | 10 | 21.30    | <a href="https://www.digikey.com/en/products/detail/wago-corporation/2001-1401/13549604">https://www.digikey.com/en/products/detail/wago-corporation/2001-1401/13549604</a>                                                                                                                                                       |
|                                   | Various Electrical Wiring components                   |                   | 1  | 50.00    |                                                                                                                                                                                                                                                                                                                                   |
|                                   | Relays                                                 | Crydom DRA        | 15 | 858.60   | <a href="https://www.digikey.com/en/products/detail/sensata-crydom/DRA-CN024D05/2263904?s=N4IqTCBcDalCICUCCBhAcqBjAFjhgrCALoC%2BQA">https://www.digikey.com/en/products/detail/sensata-crydom/DRA-CN024D05/2263904?s=N4IqTCBcDalCICUCCBhAcqBjAFjhgrCALoC%2BQA</a>                                                                 |
|                                   | Powerstrip                                             |                   | 2  | 40.00    |                                                                                                                                                                                                                                                                                                                                   |
|                                   | NI DAQ                                                 | cDAQ-9174         | 1  | 1,501.00 | <a href="https://www.ni.com/en-us/support/model.cdaq-9174.html">https://www.ni.com/en-us/support/model.cdaq-9174.html</a>                                                                                                                                                                                                         |
| <b>Headspace measurement</b>      | CO2 sensor 1 with sensor development kit               | 0-60% CO2         | 1  | 499.00   | <a href="https://www.co2meter.com/collections/20-percent-co2-sensor/products/sprintir-r-20-co2-sensor?variant=32046774026358">https://www.co2meter.com/collections/20-percent-co2-sensor/products/sprintir-r-20-co2-sensor?variant=32046774026358</a>                                                                             |
